# Supplementary material
Source: publisher site journal article supplement (https://www.dovepress.com/article/315299)
Supplement: Supplementary file 1 [file get_supplementary_file.php]

**Supplementary Materials:** **Supplemental table 1:** Oligonucleotide primers used for genotyping and detection of HBV vaccine escape-mutants 1, 2

| **No** | **Primer name** | **Sequence 5′-3′** |
| --- | --- | --- |
|  | HBV-022 | TGCTGCTATGCCTCATCTTC |
|  | HBV-065 | CAAAGACAAAAGAAAATTGG |
|  | HBV-066 | CACAGATAACAAAAAATTGG |
|  | HBV-024 | CAAGGTATGTTGCCCGTTTGTCCT |
|  | HBV-041 | GGACTCAMGATGYTGTACAG |
|  | HBV-064 | GGACTCAMGATGYTGCACAG |

References Cited

1. Al Baqlani SA, Sy BT, Ratsch BA, et al. Molecular epidemiology and genotyping of hepatitis B virus of HBsAg-positive patients in Oman. *PLoS One*. 2014;9(5):e97759. doi:10.1371/journal.pone.0097759

2. Hoan NX, Hoechel M, Tomazatos A, et al. Predominance of HBV Genotype B and HDV Genotype 1 in Vietnamese Patients with Chronic Hepatitis. *Viruses*. Feb 22 2021;13(2)doi:10.3390/v13020346
